# Supplementary material
Source: PubMed Central journal article supplement (PMC4421065)
Supplement: AEM.04050-14_zam999116271so1.pdf [file AEM.04050-14_zam999116271so1.pdf]

Supplementary material to

*Akkermansia muciniphila* adheres to enterocytes and strengthens the integrity of epithelial cell layer”

by

Justus Reunanen, Veera Kainulainen, Laura Huuskonen, Noora Ottman, Clara Belzer, Heikki Huhtinen, Willem M. de Vos, Reetta Satokari

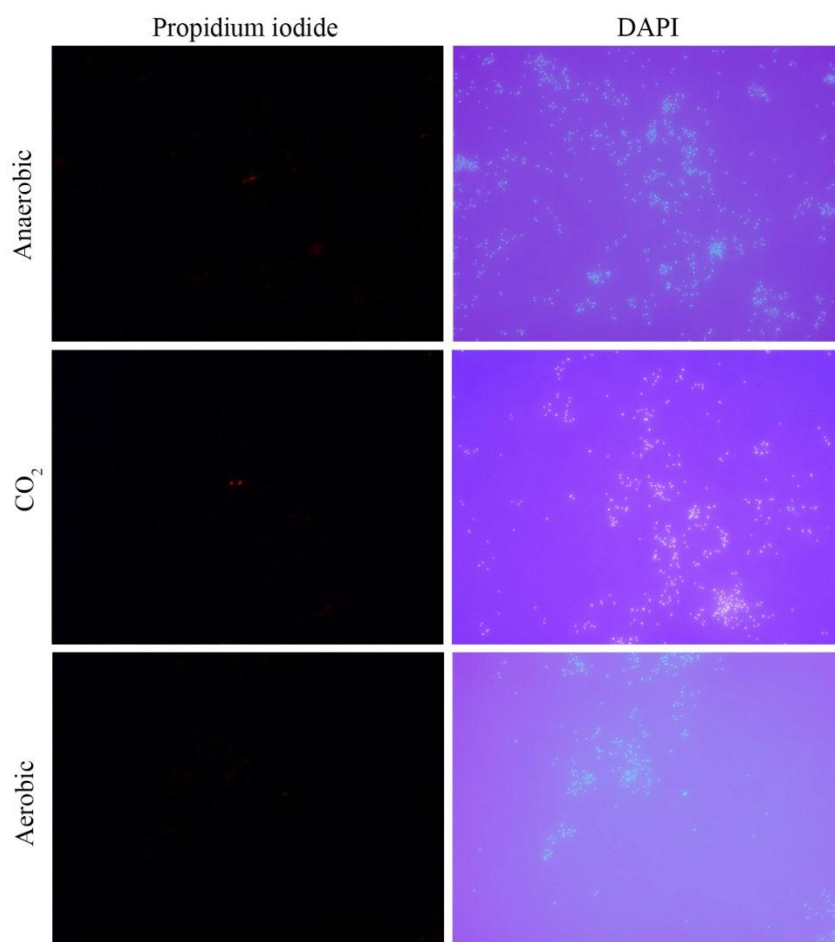

**Figure S1. Oxygen tolerance of *A. muciniphila* cells that were kept under different atmospheres and live-dead stained with DAPI (blue) and propidium iodide (PI, red).**

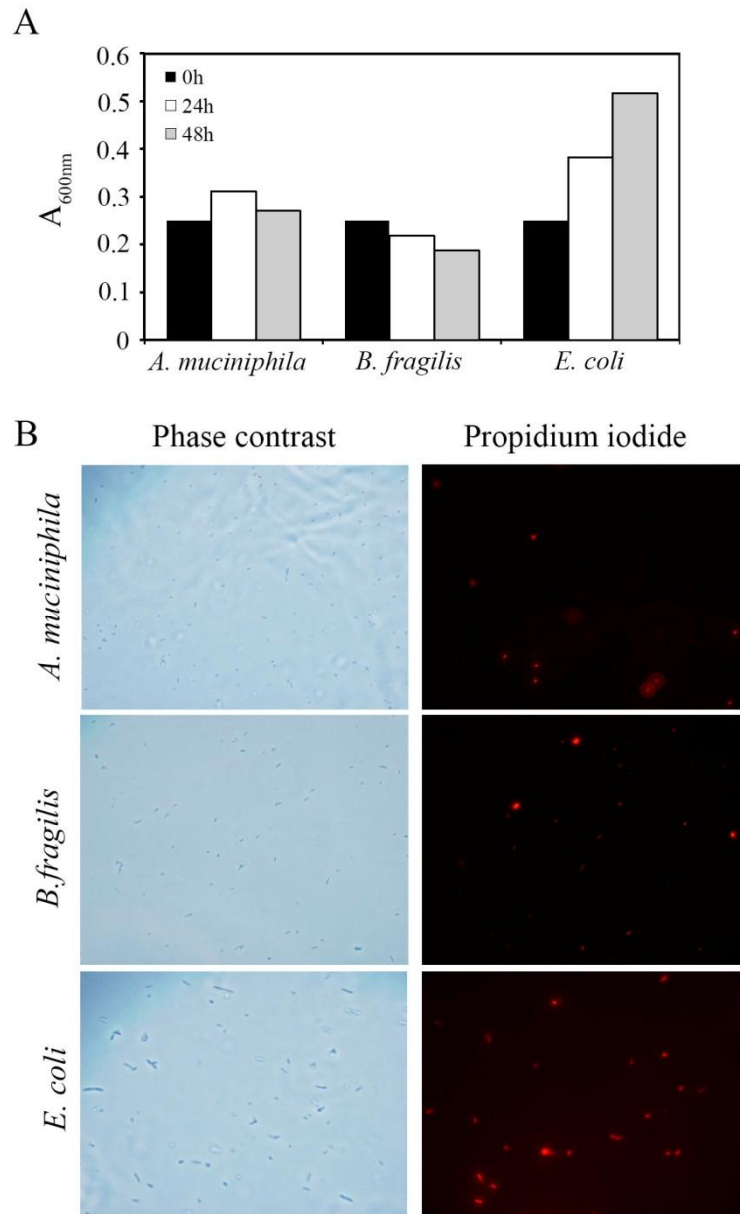

**Figure S2.** The growth and viability of the bacterial strains in the TER-assay conditions. The amount of bacteria incubated in the TER-assay medium at different time points was determined by  $OD_{600nm}$  measurement (A), and the viability of the bacteria after 48 h incubation was determined by propidium iodide (PI) staining (B).
